# Supplementary material
Source: PubMed Central journal article supplement (PMC3897302)

## Measurement

2nd derivative absorbance  
at 285nm

CD at 222nm

Intrinsic fluorescence  
peak positionIntrinsic fluorescence  
photon count at 358nmIntrinsic fluorescence  
red edge shift

Optical density

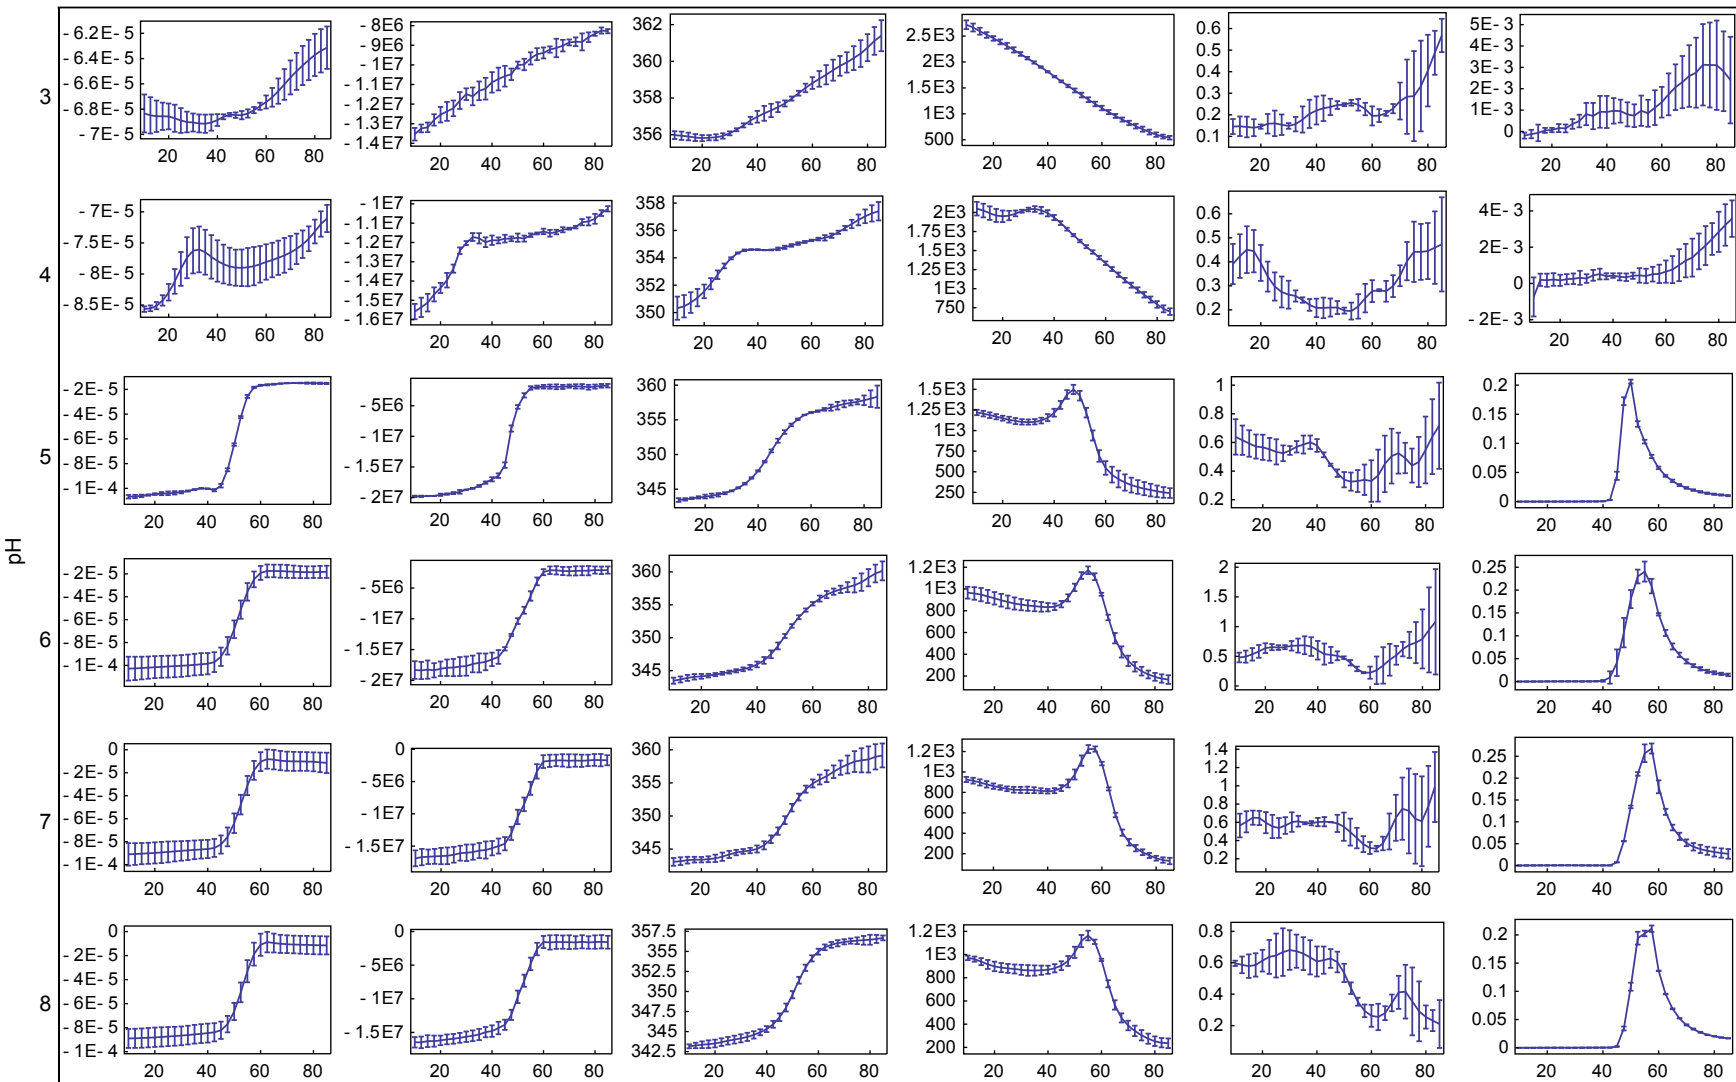

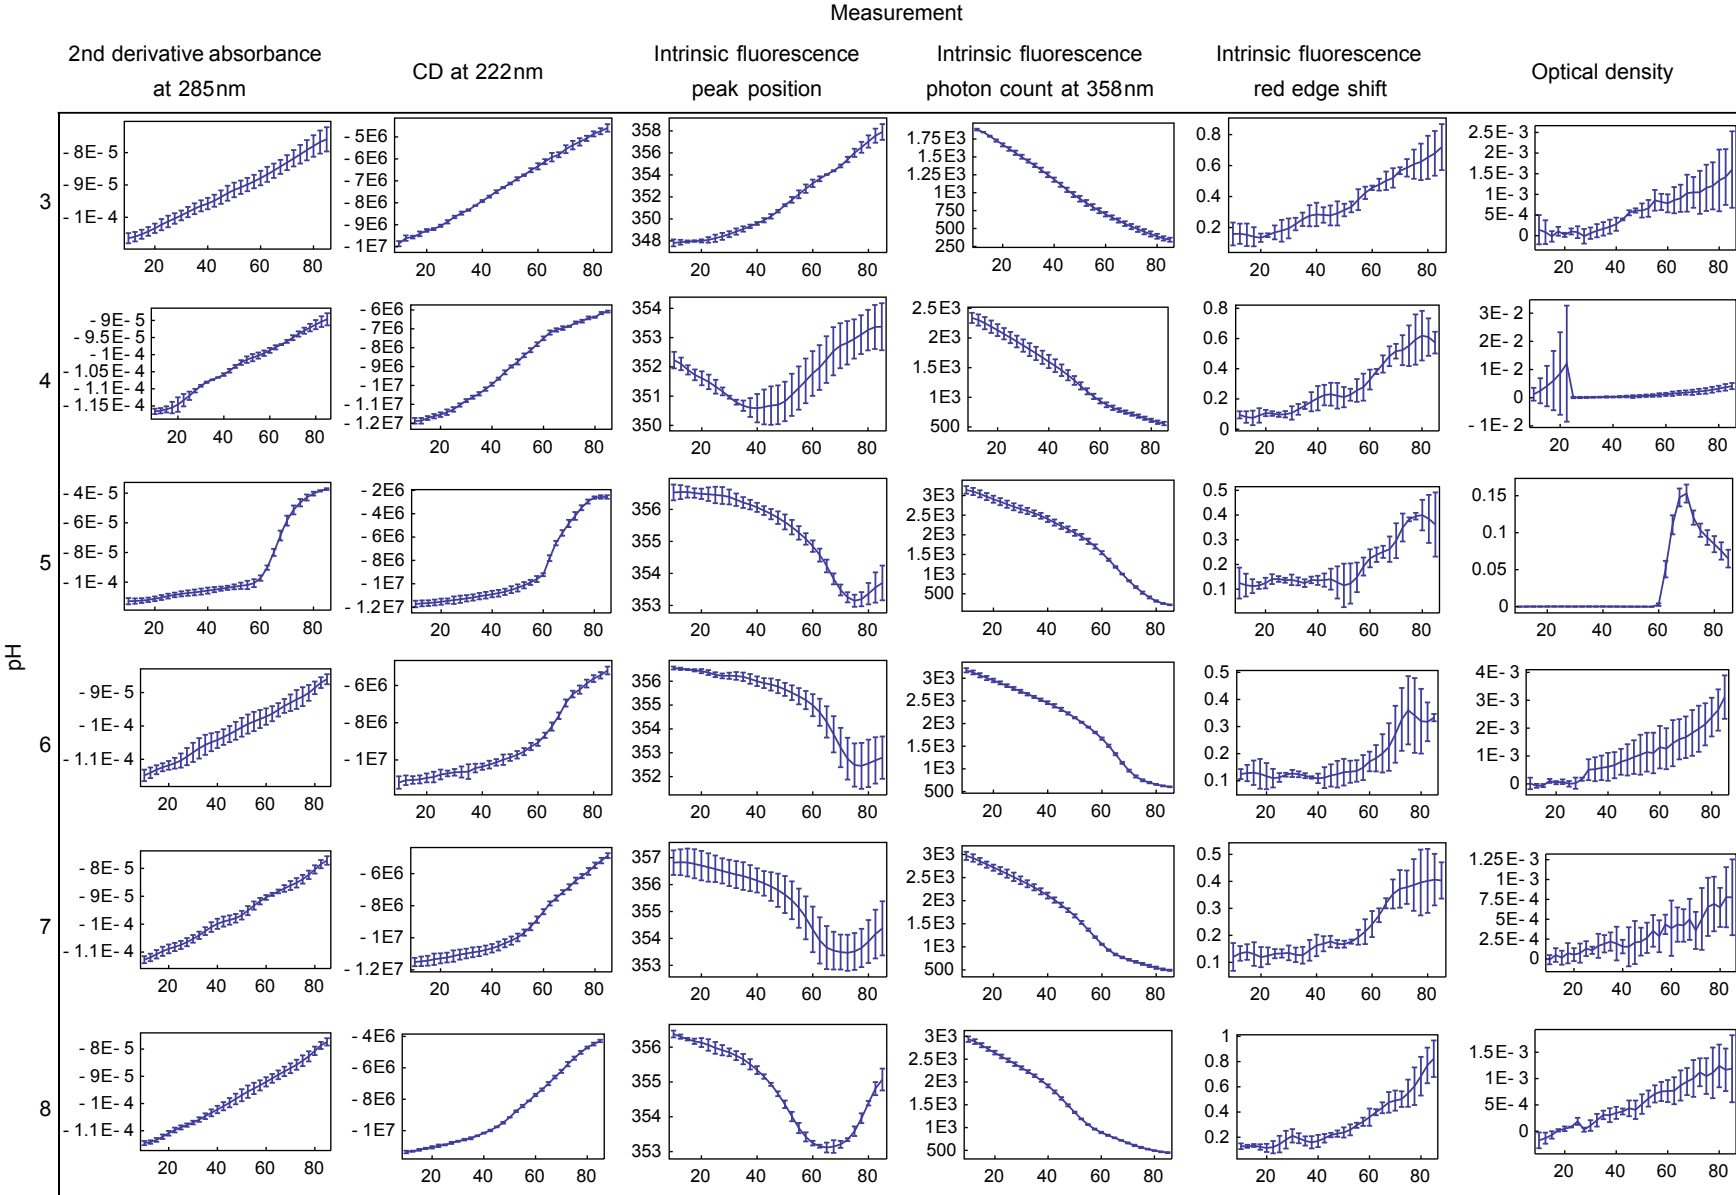

## Measurement

2nd derivative absorbance  
at 285nm

CD at 222nm

Intrinsic fluorescence  
peak positionIntrinsic fluorescence  
photon count at 358nmIntrinsic fluorescence  
red edge shift

Optical density

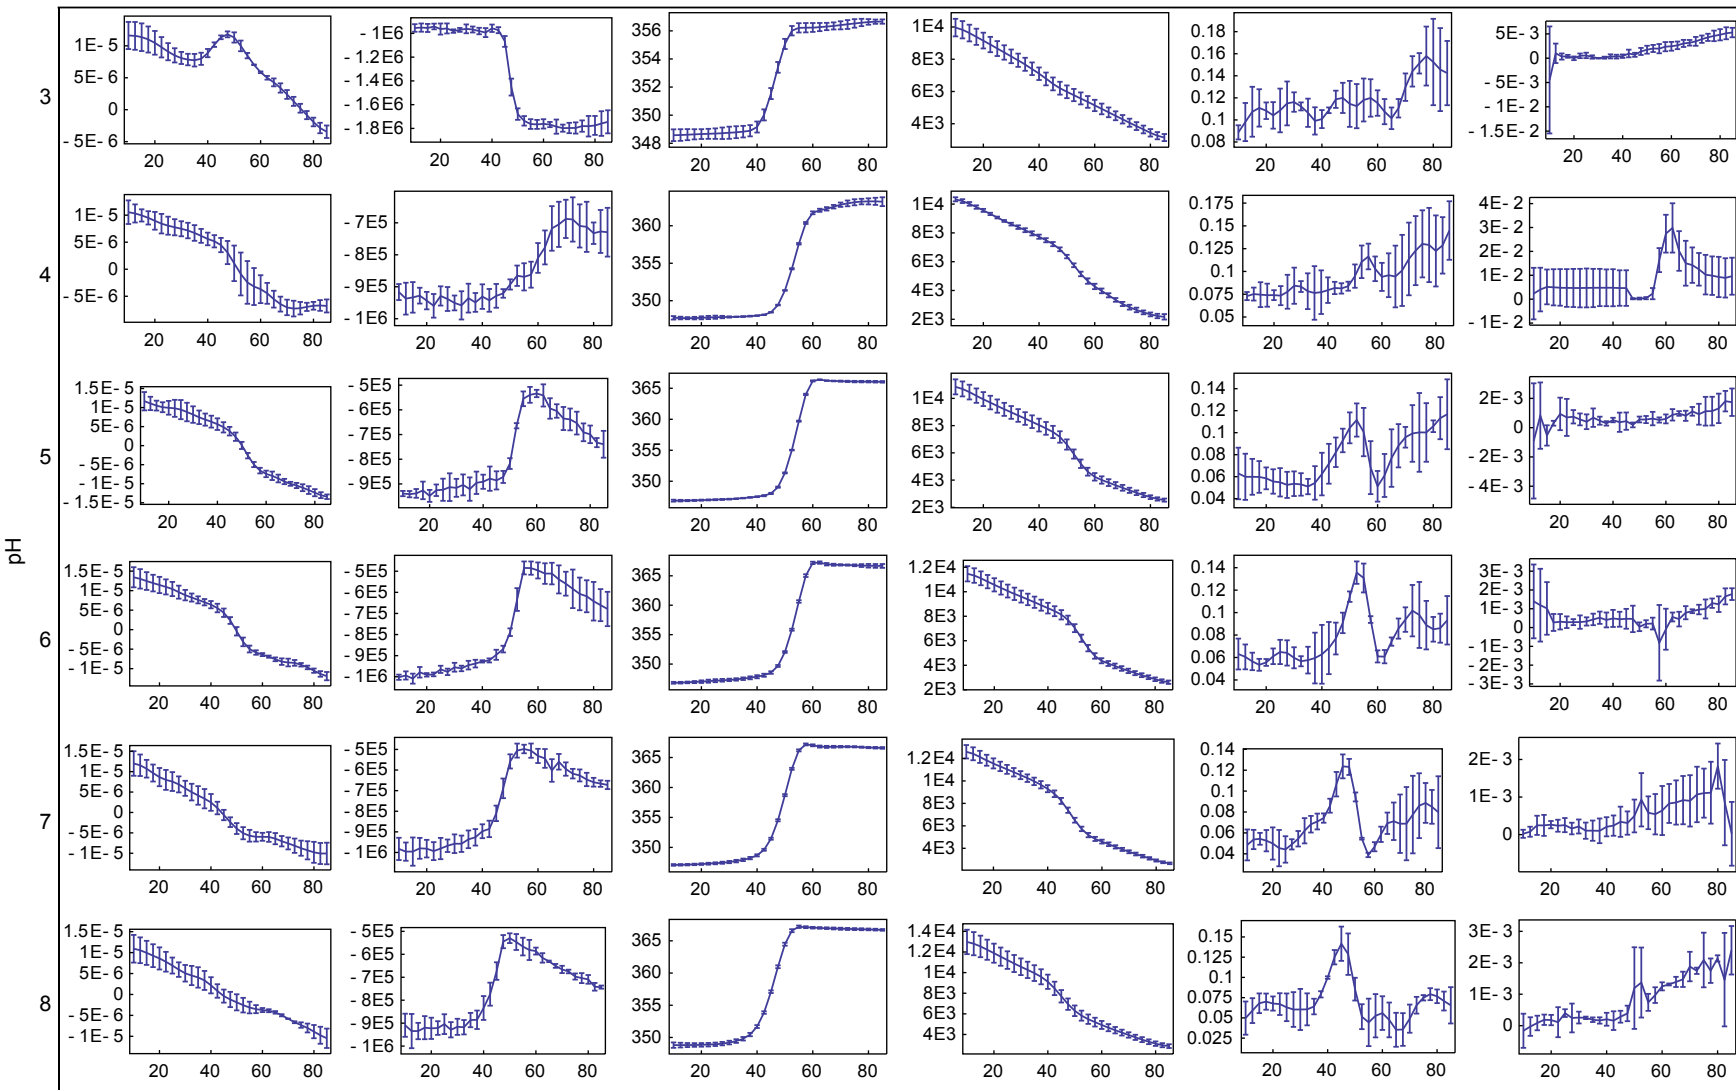

## Measurement

2nd derivative absorbance  
at 285nm

CD at 222nm

Intrinsic fluorescence  
peak positionIntrinsic fluorescence  
photon count at 358nmIntrinsic fluorescence  
red edge shift

Optical density

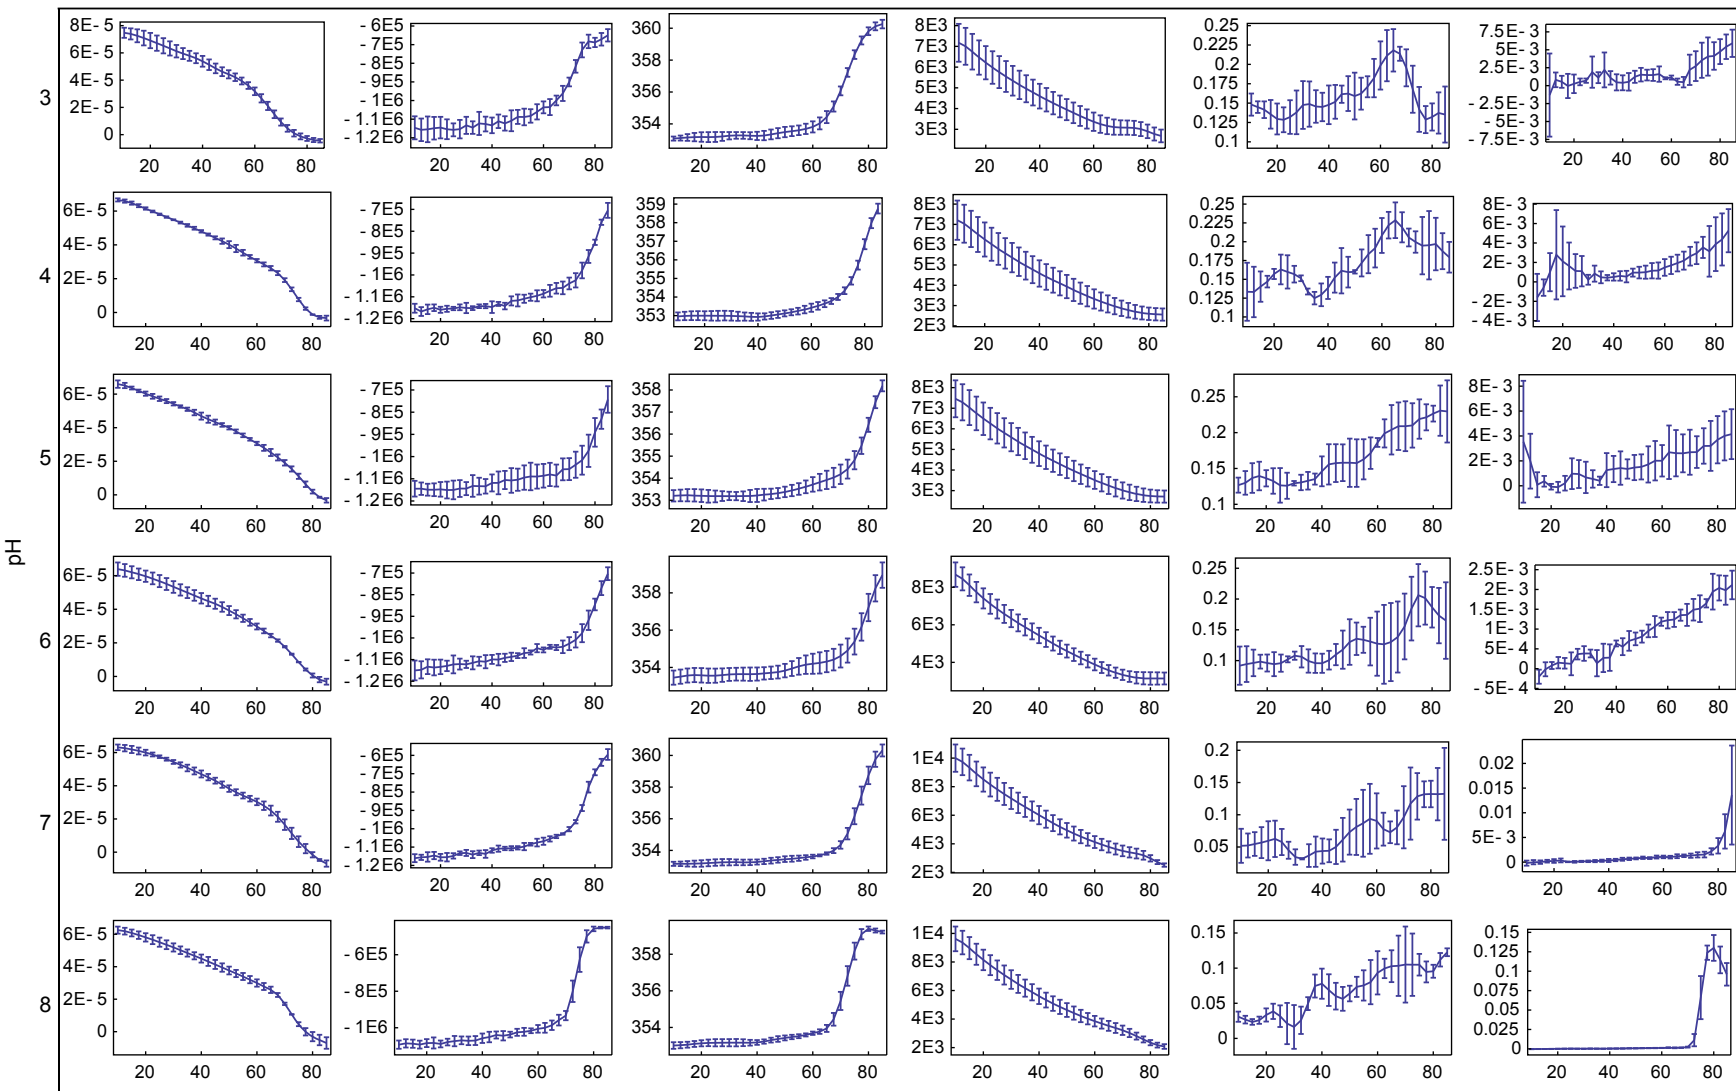

Supplement: NIHMS494482-supplement-Supp_Fig_S1-S4.pdf [file NIHMS494482-supplement-Supp_Fig_S1-S4.pdf]
